# Supplementary material for: Modeling memory in gravel-bed rivers: A flow history-dependent relation for evolving thresholds of motion
Source: Copernicus journal article supplement (doi:10.5194/egusphere-2024-3250), 2024-12-10
Supplement: Supplementary file [file egusphere-2024-3250-AC2-supplement.pdf]

**Reviewed manuscript:** Modeling memory in gravel-bed rivers: A flow history-dependent relation for evolving thresholds of motion

**Manuscript Authors:** C. Masteller and colleagues

**Journal:** Earth Surface Dynamics

**Reviewer:** Shawn M. Chartrand

**Summary and Contribution:**

The authors present an empirical model which describes the discrete time evolution of the critical dimensionless Shields number (similarity-based threshold for sediment transport; note that I use “number”, “condition” and “stress” below in an interchangeable way) using a unique field data set of streamflow discharge and sediment transport with the latter measured using an impact plate system installed within the Erlenbach located in the Swiss Prealps. The data are unique because sediment transport is quantified directly over annual hydrographs (along with observations of streamflow) with the impact plate system rather than using wading-type measurements combined with rating curves or transport functions for times lacking observations through measurement. As a result, the authors data permit them to identify streamflow conditions associated with the onset of bedload transport, removing substantial uncertainty in estimation of the critical dimensionless Shields number. The empirical model builds from prior work (Johnson, J.P.L., *Earth Surface Dynamics*, 2016) with revisions to the original model focused on describing the discrete time dependent behavior of the critical dimensionless Shields number in terms of so called “strengthening” and “weakening” processes. The model faithfully (and impressively) captures annual trends to the critical dimensionless Shields stress based on the available records during years when “strengthening” dominates and/or “weakening” events do not occur, with more variable performance for years when “weakening” dominates. To my understanding the authors model is the first of its kind in the geomorphic literature, and I congratulate them on their excellent work.

Based on several readings of the manuscript, I believe some effort is needed to address the comments and suggestions I raise below. I do not have any serious criticisms of the authors work, however, there are some conceptual points (bigger picture comments) that would benefit from thought and discussion in the manuscript. I think the manuscript is well written, and the figures nicely developed such that they add important illustrative dimensions and information to the narrative of the text. I appreciate the authors inclusion of discussion elements which add some critical review of the proposed empirical model making it clear that they have thought about their approach and results from a variety of viewpoints. Some specific examples of the points raised below include consideration of bedload transport in rivers as a “nonlocal” process which in part helps set the context of the measurement system as well as the fact that the authors calculation approach mixes time and space considerations, and additional discussion focused on the nuances around the interdependence of (in-channel) sediment supply and the critical dimensionless Shields condition. I also have a few questions around the parameter *Beta* that would benefit from clarification, most importantly, I cannot recover a (0,1) behavior of *Beta* with the form of Eq. 2 presented in the manuscript (I get negative values).

Thank you for the thoughtful review. We address these points in detail below.

I want to thank the journal editors and authors for the opportunity to review the submitted manuscript, and for your patience as I completed my review. I hope that my comments are helpful to the authors.

**Bigger Picture Comments (in no particular order)**

1. **Transport as a nonlocal process:** There has been important work completed that illustrates how bedload transport in rivers is a non-local process, i.e. that the transport (activity in the case of the

authors work) of particles close to the bed surface as measured at any particular point along a river profile  $x$  and at some time  $t$  is a function of transport processes upstream of  $x$  (within some finite distance set by the *pdf* of particle travel distances) and for some finite time interval prior and leading up to  $t$  (within some finite time interval set by the *pdf* of particle travel times; see Furbish et al., *GBR*, 2017 for a clear discussion; see Foufoula-Georgiou and Stark, *JGR*, 2010 for a broader discussion). The implications of bedload transport as a nonlocal process has relevance to the authors work in a number of ways: (1) it provides context for interpreting the time series of particle impacts at the Erlenbach measurement site [and hence time dependency of the dimensionless Shields stress and the critical dimensionless Shields stress] by offering a conceptually useful way to understand the authors “noisy transport data” as more of an expected outcome based on the explicit dependence of transport on time and space; (2) it offers a broader perspective to conclusions reached regarding deterministic variability of threshold evolution; (3) it elaborates the context for the authors concept of “memory” in that nonlocality provides a more concrete way to frame the authors proposal that memory “integrates the effects of the past history of both flow conditions and channel bed conditions” (lines 253-254, page 12 of the manuscript; although I also recognize that the authors idea of memory involves much longer time scales); and (4) it helps to better frame the authors calibration and application of Eq. 1 to the Erlenbach data because the authors approach mixes space and time effects, and a nonlocal perspective naturally reflects these two aspects of transport processes. In summary, the authors relate time variations of the critical dimensionless Shields number to conditions upstream of the point of observation. A nonlocal perspective of bedload transport can help the authors, to some degree, make these points in more concrete ways.

We added a paragraph near the end of the discussion section that brings up implications of nonlocality for the points the author raises, including understanding variability in threshold of motion evolution, how our model is deterministic, and how future work should explore the combination of local and nonlocal influences on “memory” encoded in thresholds of motion:

“At the same time, nonlocal controls on sediment transport will fundamentally limit how well local discharge alone can explain local sediment transport rate. Previous work demonstrates that bedload transport is a nonlocal process, because at a given location the flux reflects not only local conditions, but also spatial and temporal variations in upstream flow, sediment supply, and transport rate (e.g., Foufoula-Georgiou and Stark, 2010; Furbish et al., 2017; Martin et al., 2012). Variability from nonlocality limits the accuracy of all models for calculating bedload flux at a specific location based on local shear stress, and is not unique to our threshold evolution equation. Local flux models also cannot capture spatial and temporal grain dispersion which is as important as advection for understanding bedload transport through river networks and responses to perturbations (e.g., Bradley, 2017; Pretzlav et al, 2021; Fan et al., 2016). Our model could be applied to better determine the extent to which threshold variability (and associated transport rate variability) is a deterministic function of discharge (as Equation 1 attempts to represent), and how much of the local transport rate signal is stochastic variability, influenced by a variety of interrelated factors including nonlocality and sediment supply. Future work could also explore how the “memory” of past conditions at a given location, imperfectly encoded in  $\tau_{c^*}$ , depends on both local discharge variability and nonlocal supply effects.”

**2. Equation 1 and Beta:** In section two the authors discuss their model for the time evolution of the critical dimensionless Shields condition. I think this section will benefit from more direct discussion of the development part of the model. As it stands the section explains the components of the model

and why specific elements, etc. are justified, but their discussion does not provide much detail on the model development side. For example, if someone else attempted to recreate the authors model working from the existing text and supplemental information alone, do they have enough information to guide their thinking and decision making to eventually lead them to the form of the model presented in Eq. 1? Basically, what were the key steps or decisions made that led the authors to the present model formulation. To be clear, I am not suggesting that the authors list out every decision made along the way to the formulation of Eq. 1, but rather they provide enough information to better understand the key steps in getting there. Perhaps this can be addressed by prefacing the presentation of Eq. 1 by stating explicit hypotheses or specific ideas that underpin the authors thinking (this is briefly done at the end of section one but I am suggesting it is done in relation to presenting the proposed empirical model). Among other reasons, providing more clarity around model development will help future readers as they attempt to apply and test the model to any particular circumstance. With this in mind, it may be helpful to write out the discretized form of Eq. 1, or specify the time marching components of Eq. 1 with notation so it is clear how the initial and time dependent values are specified in the calculation procedure.

We have addressed this by both rearranging the section, and adding text to more completely explain why we picked the sigmoidal and power-law functions for the strengthening and weakening terms. We moved text from the end of the section to right after equation 1 is first presented, that the reviewer describes as giving our ideas underpinning the model. In particular, the expanded and rearranged paragraphs are these:

“The strengthening and weakening terms combine to cause increases and decreases in  $\partial\tau_c^*/\partial t$  (Eq. 1; Fig. 1). The strengthening term is generally sigmoidal for  $\gamma > 1$ ; it goes to zero as  $\tau^*$  approaches zero, and asymptotes to a value of  $k_1 B$  for  $\tau^*/\tau_c^* \gg 1$  (Fig. 1a). We chose a sigmoidal form in order to have strengthening over a wide range of flows, but also to limit the amount of incremental strengthening that can result from changes in grain organization at higher transport capacities. When  $\tau^*/\tau_c^* < 1$ , flow causes the bed to become stronger but not weaker, consistent with previous observations (Haynes & Pender, 2005; Masteller et al., 2019; Masteller & Finnegan, 2017; Monteith & Pender, 2005; Ockelford et al., 2019). Strengthening increases as  $\tau^*/\tau_c^*$  approaches 1, consistent with some (Paphitis & Collins, 2005), but not all previous work (Haynes & Pender, 2007). Strengthening increases further for  $\tau^*/\tau_c^* > 1$ , consistent with protrusion-dependent thresholds (Masteller and Finnegan, 2017, Yager et al., 2018; Masteller et al., 2019), and with coarse grain clustering, which increases bed stability and requires transport to develop (Brayshaw, 1985; Church et al., 1998; Hassan et al., 2020; Johnson, 2017; Strom et al., 2004).

At the same time, as  $\tau^*/\tau_c^*$  exceeds 1, the weakening term becomes increasingly important (Fig. 1). In the absence of other constraints on the functional form of weakening with increasing  $\tau^*/\tau_c^*$ , we chose a power-law relation for simplicity. It seems likely to us that beds rapidly lose their strength as transport rate increases and grains are no longer interlocked through intergranular friction (Yager et al., 2018). Higher shear stresses capable of mobilizing more sediment grains can destabilize a larger fraction of the bed. Impacts from transported grains may also directly contribute to destabilization (Ancely & Heyman, 2014; Heyman et al., 2014; Lee & Jerolmack, 2018; Martin et al., 2014). Nonetheless, we note that the model is agnostic towards any specific processes driving strengthening and weakening. The combination of terms results in the transition from strengthening to weakening occurring at different  $\tau^*/\tau_c^*$ , depending on  $\gamma$ ,  $\epsilon$ ,  $k_1$ ,  $k_2$ , and  $\tau_c^*$  (Fig. 1b).”

The present text lists *Beta* (Eq. 2) as a ratio of the differences between the max/min critical dimensionless Shields stress and the time dependent critical dimensionless Shields stress, respectively. Based on my reading of the manuscript I have assumed that the authors used max and min values of 0.36 and 0.036, respectively, for all associated calculations (Fig. 1 caption). However, I am not sure if this is the case. If this is true and using the form of *Beta* given in Eq. 2, it seems that *Beta* should be negative at times when the critical dimensionless stress > the min dimensionless critical Shields condition (0.036?), and < the max dimensionless critical Shields condition (0.36?)-- for example if the critical dimensionless Shields number has a value of 0.05. However, the authors state that *Beta* ranges from a value of 0-1 (lines 99-100). What am I missing? What were the values of the max and min dimensionless critical Shields stress used in the calculations of Eqs. 1 and 2? Did they change in time? Why is the authors form of *Beta* different from the form given by Johnson, 2016 (Johnson, J.P.L., Earth Surface Dynamics, 2016)? Were the max and min values calculated with the power law forms given after Eq. 2? If so, what was the value(s) of *S* used (based on the min/max values given in the Fig. 1 caption, the power law forms of the min/max suggest  $S \sim 0.11$ )? Also, based on the form of Eq. 2, it is difficult for me to imagine how *Beta* takes a value of 1 because the max and min values of the critical dimensionless Shields number by definition will never be equal. Clarification around *Beta* will be helpful.

We are very sorry. Our equation had a significant typo which we overlooked, and have now corrected. The form of Beta is exactly the same as that given by Johnson, 2016.

Last, the supplemental information provides important information related to calibration of Eq. 1. based in part on the work of Paphitis and Collins, 2005 (Paphitis and Collins, *Sedimentology*, 2005). It is important that this information is presented in the main text because it is key to calibration of the *Gamma* exponent of Eq. 1 term 1, and second because the referenced work was conducted experimentally using sand sized particles, which diverges from the Erlenbach field conditions.

We have moved the calibration and the rest of the supplementary material into the main paper, as requested.

**3. Critical Shields condition:** Conceptually, I stumble over how to disentangle the critical dimensionless Shields condition, the dimensionless Shields condition and the sediment supply. The critical dimensionless Shields condition and the dimensionless Shields condition are derived quantities that are calculated based on specific information (e.g. the authors estimation of the dimensionless Shields number and the critical dimensionless Shields number relies on an empirical rating curve relating streamflow discharge to the local average dimensional shear stress [Yager, E.M., PhD thesis, 2006]). Meaning, it is not possible to directly measure a critical dimensionless stress or Shields condition. The authors record of particle impacts removes a substantial degree of uncertainty related to when transport begins in the monitored section of the Erlenbach. However, the principal metrics are still subject to calculation. On the other hand, sediment supply delivered to some position *x* and for some time interval  $t+\Delta t$  is a tangible thing, something that given adequate technology, etc. can be measured and quasi-directly quantified (or at least approximately so) because it is a physical response. In rivers, for example, the diligent and careful use of sediment baskets and similar passive measurement apparatuses situated in the streambed can provide a reasonable record of supply magnitude, grain size composition and the rough time interval over which a basket fills (e.g. Hassan and Church, *Water Resources Research*, 2001).

This is an interesting interpretation with which we respectfully disagree, at least in part. Shear stress is a physically meaningful variable, as is sediment supply. The sediment supply to a reach is the sediment transport rate from just upstream into a given reach. In principle, it is possible to measure sediment transport rate, as the reviewer points out, it is just difficult. But it is also possible—and arguably easier—to measure shear stress. We think of dimensionless shear stress, and critical dimensionless shear stress, as physically meaningful measurements as well. Shear stress is the product of slope and flow depth (or hydraulic radius). Slope is constant, so flow depth is the main driver for variability. Depth can be both precisely and accurately measured, as can the onset of particle impacts. Respectfully to the reviewer, the installation of impact plates at the Erlenbach, and associated measurement capabilities for flow depth and mass flux measurements, makes it a state-of-the-art measurement facility. Ample, diligent work has been done by multiple authors of this article to reliably calibrate impact plate records to bedload flux and grain size composition. It is correct that at the Erlenbach the impact plates are positioned in a cross-section slightly downstream of the natural channel but work from the authors has demonstrated that a typical travel time for a bedload particle from the natural bed to the geophone plates is about 30s (which is less than the measurement period). Based on this previous work, we emphasize that the Erlenbach impact plate and discharge records, and by extension, our calculations of critical Shields stress, represents both a measurable difference in sediment transportability at the Erlenbach, but also a physically meaningful difference in the threshold for motion.

At several locations in the manuscript the authors state or use other studies to suggest that sediment supply influences threshold evolution (lines 43-44), and in turn that supply depends on thresholds (lines 58-60).

We reworded the sentence at lines 58-60; we were not trying to say that sediment supply depends on thresholds (rather, thresholds depend on the supply). (That said, we do not think it is necessarily wrong, as the sediment supply into a given reach depends on the integrated sediment transport rate from upstream, which in turn depends on the distribution of transport thresholds upstream. But, this is not the focus of this part of the introduction).

I understand conceptually how thresholds and sediment supply are inter-related, noting that “sediment supply” can mean a couple different things—i.e. in-channel storage, hillslope derived, and so forth. It would be helpful if the authors developed an expanded discussion of sediment supply vs. thresholds in which they more carefully step through the nuances of how these are inter-related and inter-dependent, and what is explicitly meant by sediment supply in the context of the manuscript. The last paragraph of section six could be suitable to expand the discussion, although it would be more impactful to have this presented in section one as the reader will have a clearer picture when reading the remainder of the manuscript.

We modified both the introduction and the discussion section to address this point, attempting to better clarify how discharge and sediment supply both influence threshold evolution. First, to make it more directly clear how the threshold parameter gets used to calculate bedload transport rate, we added the classic Meyer-Peter and Muller equation and use it to illustrate how the threshold parameter is a lumped measure to account for all factors other than fluid forcing that influence transport rate, including both discharge variability and sediment supply. Second, we rearranged and added introduction text to more obviously separate citations of previous work describing threshold changes with discharge and threshold changes with sediment supply. Third, near the end of the section we now describe how timeseries of discharge and shear stress are easier to constrain than upstream sediment supply to a given reach, and also how the sediment supplied to a given river reach is not independent of discharge,

since that supply is sediment transported by flow in the river. We added the citation to Hassan and Church, 2001. Finally, we reworded to make it even more clear that our goal in the present analysis is to explore how well discharge variability alone can explain threshold evolution.

In the discussion, we expanded our thoughts on sediment supply controls with this edited paragraph:

“Perhaps the biggest mechanistic limitation of our model is that it only accounts for discharge controls on evolving thresholds, even though sediment supply has also been shown to explicitly influence transport rates in the Erlenbach data (Turowski et al., 2011, Rickenmann, 2020; 2024). In flumes, it is straightforward to impose the upstream sediment supply, measure the flux exiting the flume, and simultaneously measure changes along the flume bed, allowing thresholds to be evaluated through time as a function of supply (e.g., Johnson, 2016). We are unaware of field monitoring sites that directly measure comparable timeseries of transport data in sequential channel reaches, making it difficult to directly isolate supply controls on threshold evolution in field settings. Some sources of sediment supply into a given channel reach, such as shallow landslides a short distance upstream not triggered by precipitation, may be uncorrelated with channel discharge. However, the timing and magnitude of many processes that supply sediment to channels, such as bank failures, debris flows, and shallow landslides driven by very recent precipitation, are likely correlated with timeseries of channel discharge. In addition, sediment supplied from farther upstream in a watershed is transported into a given reach by channel flow. Seasonal trends in supply, such as from increased activity of hillslope processes during winter months followed by subsequent snowmelt or storm flow that evacuates the sediment (e.g., Moog and Whiting, 1998; Mao et al, 2014), are not controlled by discharge but nonetheless may correlate with cumulative discharge as gravel is transported through the channel (e.g., Pretzlav et al., 2020). Therefore, discharge timeseries may be able to implicitly account some temporal variations in local supply, and therefore possibly be able to explain some supply-dependent  $\tau_c^*$  variability. The degree of correlation between supply timeseries and discharge timeseries would likely vary among watersheds based on dominant processes. Future work should attempt to disentangle how sediment supply influences our parameter calibrations.”

**4. Bedload transport and threshold conditions:** There are discussion elements which frame bedload transport around threshold conditions, inter-connections between these conditions and gravel-bed river geometry (e.g. lines 22-23; lines 222-224) and the nature of threshold conditions during floods or transporting events (e.g. lines 22-23, lines 38-39, lines 58-61). In several cases there is important literature missing from the discussion. For example, ideas around bedload transport, transporting floods and gravel-bed river geometry have been the subject of significant field-based data collection efforts, some of which provide results not as definitive as that suggested in the present form of the manuscript. Whiting et al., 1999 (Whiting et al., *GSAB*, 1999) present a comprehensive dataset based on hundreds of bedload measurements across more than 10 headwater rivers which suggests that gravel-bed river geometry is maintained in the Idaho batholith (a snowmelt dominated system) at flows less than bankfull (~0.80 bankfull), with the common 1- to 2-orders of magnitude variability in the sediment-flow rating curves. There are many other examples in the literature as well (that I know the authors are aware) which suggest that bankfull flow is not necessarily the most important flow in maintaining channel form (geometry). I raise this point because the subject is the matter of significant debate in fluvial geomorphology, and presenting a more balanced picture of what the literature

suggests seems appropriate.

We respectfully note that the focus of the manuscript is on evolving thresholds of motion, not channel geometry, morphodynamic feedbacks, or any analyses of bankfull vs effective discharges. We briefly mention in a small number of places that gravel-bed rivers can be modeled as threshold channels where the threshold of motion is an important control on channel morphology, but do not get into any real discussions of the significance of bankfull flows, or flows that are close but not quite bankfull.

In the discussion, we added a citation to Whiting et al. (1999) and also to Emmett and Wolman (2001), and de-emphasized the importance of bankfull flow to river geometry. The new wording is this:

“Sediment is transported infrequently in gravel-bed rivers because of  $\tau_c^*$ . Much transport occurring during at conditions just exceeding the threshold of motion during discharges that are often relatively close to bankfull (e.g., Emmett and Wolman, 2001; Parker 1978, Phillips and Jerolmack, 2016; Pretzlav et al., 2020; Whiting et al., 1999).”

#### Minor and Editorial Comments

**Lines 16-17 (comment also relates to lines 237-238).** The sequence, timing and magnitude of significant precipitation events and heatwaves (both of which cause floods) are stochastic. Because “weakening” events are directly linked with floods, the authors conclusion that weakening events are more stochastic than strengthening ones is clear. Use of the phrase “...suggests that flood-induced bed weakening is more stochastic and less predictable then strengthening.” is a little confusing. Are there additional mechanisms not related to flood events (this would include mass movements, etc.) that could cause weakening? I guess I am unsure whether this is a surprise or unexpected from the authors point of view? I think the authors specifying “more stochastic and less predictable” is what is causing my confusion. Also, what does “more stochastic” mean?

We are trying to express the variability in terms of sediment transport, not the hydrologic processes. How much transport thresholds change, and how predictable the magnitude of those changes are, may be more variable and therefore harder to predict within some level of tolerance or accuracy, than strengthening changes. This is separate from floods themselves being harder to predict than base flow.

We changed the wording to hopefully better express this, while still keeping the wording short and focused in the abstract: “...magnitudes of bed weakening may be more variable and difficult to accurately predict as a function of flood characteristics than strengthening during lower flows.”

**Lines 22-23.** What do “close” and “floods” mean? Can the authors be more specific?

We changed the wording to be more specific: “Bedload transport often occurs at shear stresses only slightly higher than threshold conditions even during large floods...”

**Lines 23-26.** Blom et al., 2017 conclude that the influence of climate change (and hence extreme floods) to river geometry in the zone downstream of the hydrograph boundary layer and upstream of the terminal backwater zone may be negligible (page 19 of Blom et al., 2017). How does this fit into the concept of mapping “climate onto fluvial processes”?

In this one motivating sentence we tried to summarize how the literature we cite here, including (but not limited to) Blom et al., describe a range of ways in which hydrograph variability, which is influenced by climate, in turn influences bedload transport and channel evolution. We think that the arguments of Blom et al. (2017) that the reviewer mentions are reasonably described as “the relative importance of extreme events for channel evolution” (our original wording). Nonetheless, to clarify the reviewer’s point, we changed the wording to “the relative importance (or unimportance) of extreme events for channel evolution”.

**Lines 27-29.** I had to read this sentence a few times to understand it. Can the authors re-phrase for clarity?

We rewrote the sentence to have a simpler structure and to be clearer.

**Lines 57. Minor point:** Do all sediment pulses cause disequilibrium? Sediment pulses are commonly of short relative timescales. Ideas around disequilibrium can be associated with longer relative timescales. Pulses can disrupt local bed elevations, grain size populations and hence local transport rates—this fits at least two ideas of disequilibrium. But pulses can also fall under the concept of dynamic equilibrium. I am wondering if/how disequilibrium as used in this sentence differs or is similar to the use of the same word in the following sentence?

So as to avoid going “down a rabbit hole” of explaining different meanings and usages of transport disequilibrium, we reworded the parts of the introduction that used the term. We feel like explaining it would be a digression that would take away from our focus on thresholds.

**Lines 58-70.** I think the work of Moog and Whiting, 1998 (the authors include this work in their references) is relevant to the discussion here. The key from Moog and Whiting relates to hysteresis and their data which suggest that prior to the occurrence of the estimated transporting flow each season, there was higher bedload transport for a given flow than afterward. This trend was attributed to limitation or exhaustion of in-channel sediment supply as the snowmelt hydrograph progressed. This comment in part relates to my “bigger picture” comment above related to sediment supply and the Shields condition.

We now cite Moog and Whiting (1998) in the previous paragraph while talking about sediment supply and transport thresholds.

**Lines 165-166.** How do you know that certain data are “outliers”? Does the concept of an outlier make sense in an inherently “noisy” system? Even time series of flux or transport in the most simple of experiments is, for example, noisy (for example, see Fig. 6 of Ancey et al., *Physical Review E*, 2006).

We changed the wording from “outliers in rather noisy transport data” to “field-based data points which exhibit large amounts of scatter”. We were not trying to imply that we omitted any individual points (outliers) from the analysis (we did not).

**Lines 179-186 – Figure 2.** Nice figure with lots of great information. What do the black dots in the lower panels represent? I read carefully and could not find mention of what they represent.

Thanks for this. We added the following line to the figure caption (now figure 3): “Comparison of field data (black dots, representing  $\tau_c^*$  at the start of each transporting event) to the best-fit model(s). “

**Lines 219.** “...higher *relative* transport capacities”?

We changed the sentence to better reflect what we were trying to say: “The transport capacity ( $\tau^*/\tau_c^*$ ) at which the model terms combine to transition from overall strengthening to weakening varies for different parameter combinations (Figure 1).”

**Lines 228.** There is a missing word towards the end of the line.

We reworded the sentence.

**Lines 257-258.** The sequence, timing and magnitude of future floods is a stochastic phenomenon dependent on future climate conditions, etc. I believe it is generally held that future conditions can be “projected” (not predicted) when there is a dependence on climate-related phenomena because of the probabilistic nature of the problem. Perhaps I misunderstand the intent of the sentence?

Looking at the sentence in question in isolation (“by knowing  $\tau_c^*$ , one can predict future channel response to floods”), we can see how it is a stronger statement than we intended. We have reworded to “For the Erlenbach, our results using the calibrated model demonstrate that knowing  $\tau_c^*$  prior to a given flood improves the prediction of transport during that flood.”

**Lines 258-262.** I encourage the authors to provide a more comprehensive discussion of how their model of the critical dimensionless Shields stress can be applied in other circumstances, with particular details related to what data, at a minimum, are necessary to locally calibrate their Eq. 1. I think data additional to a high-resolution discharge time series is necessary.

We have added a paragraph that expands on how we envision applying the model to other data sets. We were not trying to imply that a discharge timeseries was the only data required for a calibration. The new text says (in part):

“Reach-averaged starting values of  $\tau_c^*$  could be estimated based on bed grain size and bankfull geometry. Additional model calibration will vary depending on the intended application of the equation. To characterize long-term variability in  $\tau_c^*$ , calibration of the model over approximately 30 transport events may be needed to reliably capture the expected variability of  $\tau_c^*$ , assuming a normal distribution, as observed at the Erlenbach by Masteller et al. (2019). However, this commonly used minimum sample size assumes independent observations, which does not apply here. An alternative approach is to calibrate the model based on the number of subsequent events over which  $\tau_c^*$  remains correlated. Masteller et al., (2019) also found a loss of correlation between  $\tau_c^*$  values after 10-13 transport events. This number of events may be sufficient to calibrate the model to capture the trajectory of  $\tau_c^*$  over time. We recognize that requiring 10–30 measurements of  $\tau_c^*$  observations may not always be feasible. Future studies should assess the necessary level of calibration for different applications.”

**Lines 263-265.** I don’t understand how “transport disequilibrium” influences transport rates? My understanding of the idea is that transport disequilibrium depends on how observed transport compares to calculated transport (Rickenmann, D., *Water Resources Research*, 2020).

For simplicity and to avoid a digression into definitions of transport disequilibrium, we removed those words from the sentence; now it says this: “Perhaps the biggest mechanistic limitation of our model is that it only accounts for discharge controls on evolving thresholds, even though sediment supply has also been shown to explicitly influence transport rates in the Erlenbach data (Rickenmann, 2020; 2024).”

To answer the question, we were intending transport disequilibrium in the same way that Johnson (2016) used the term: Equilibrium transport in a given reach means that the flux in and out of the reach are matched; this is the equilibrium condition that reaches tend towards (e.g., Mackin, 1948, Concept of the Graded River). Disequilibrium transport implies net erosion or deposition in a given reach. Rickenmann defined the “disequilibrium ratio” in the way the reviewer describes.

**References not in the manuscript:**

Ancey, C., Böhm, T., Jodeau, M., and Frey, P.: Statistical description of sediment transport experiments, *Physical Review E*, 74, 11302–11302, <https://doi.org/10.1103/PhysRevE.74.011302>, 2006.

Foufoula-Georgiou, E., and Stark, C.: Introduction to special section on Stochastic Transport and Emergent Scaling on Earth's Surface: Rethinking geomorphic transport—Stochastic theories, broad scales of motion and nonlocality, *J. Geophys. Res.*, 115, F00A01, doi:[10.1029/2010JF001661](https://doi.org/10.1029/2010JF001661), 2010.

Furbish, D. J., Fathel, S. L., and Schmeeckle, M. L.: Particle Motions and Bedload Theory: The Entrainment Forms of the Flux and the Exner Equation, in: *Gravel-bed rivers*, Wiley-Blackwell, 97–120, <https://doi.org/10.1002/9781118971437.ch4>, 2017.

Hassan, M. A., and M. Church: Sensitivity of bed load transport in Harris Creek: Seasonal and spatial variation over a cobble-gravel bar, *Water Resour. Res.*, 37(3), 813–825, doi:[10.1029/2000WR900346](https://doi.org/10.1029/2000WR900346), 2001.
